# Supplementary material for: Zinc calixarene complexes for the ring opening polymerization of cyclic esters
Source: Royal Society of Chemistry journal article supplement (doi:10.1039/c4dt02226b), 2014-01-01

Electronic supplementary information

## Zinc Calixarene Complexes for the Ring Opening Polymerization of Cyclic Esters

Mark J. Walton,<sup>a</sup> Simon J. Lancaster,<sup>a</sup> Joseph A. Wright,<sup>a</sup> Mark R.J. Elsegood<sup>b</sup> and Carl Redshaw<sup>c\*</sup>

Figure S1. MALDI-TOF spectrum of the PCL from run 5, Table 2.

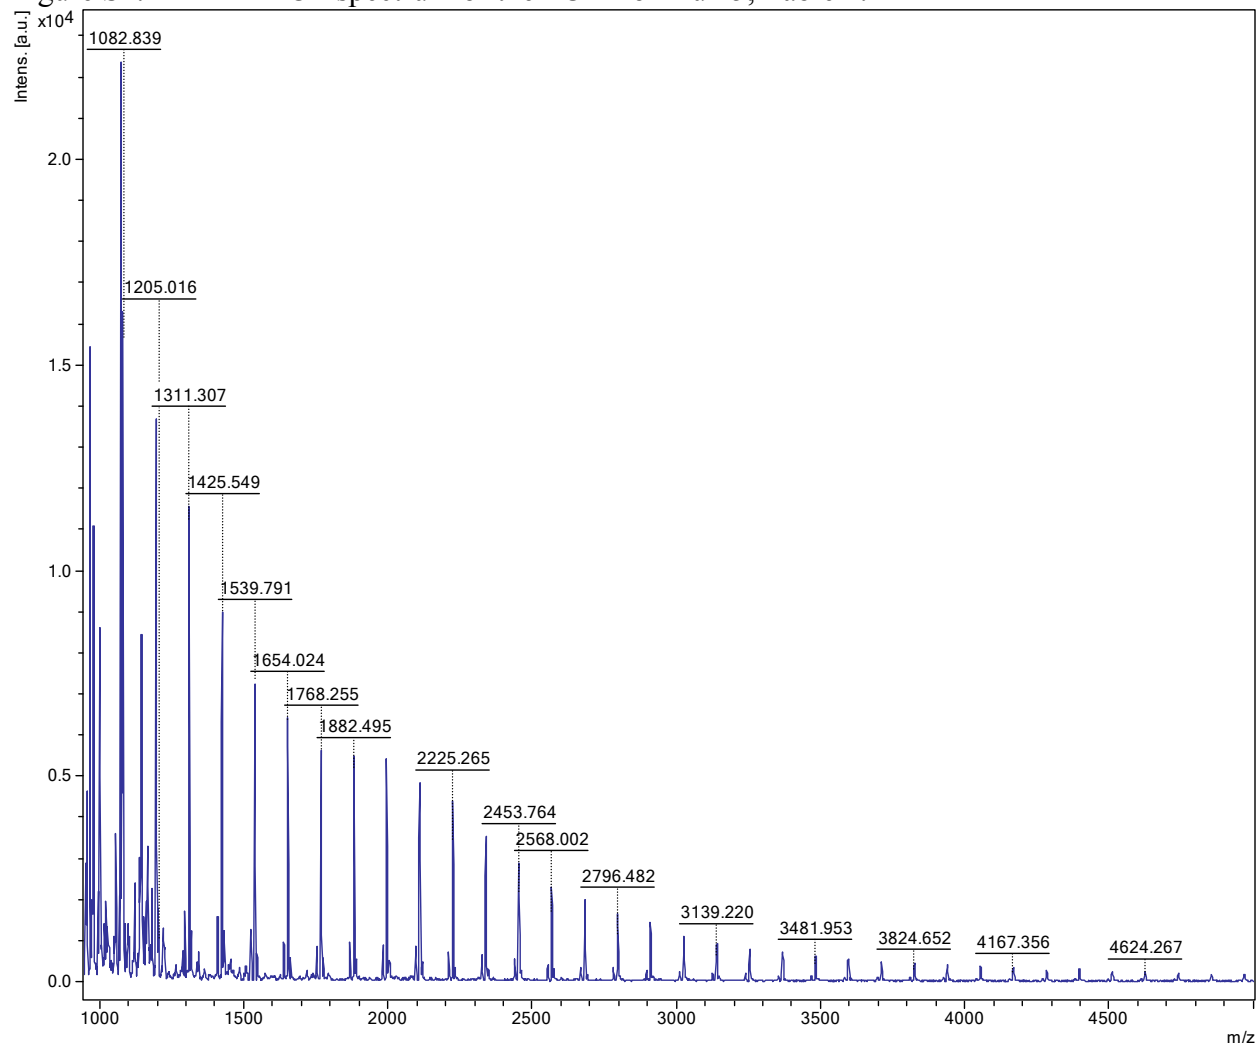

Figure S2. MALDI-TOF spectrum of the PLA from run 20, Table 2.

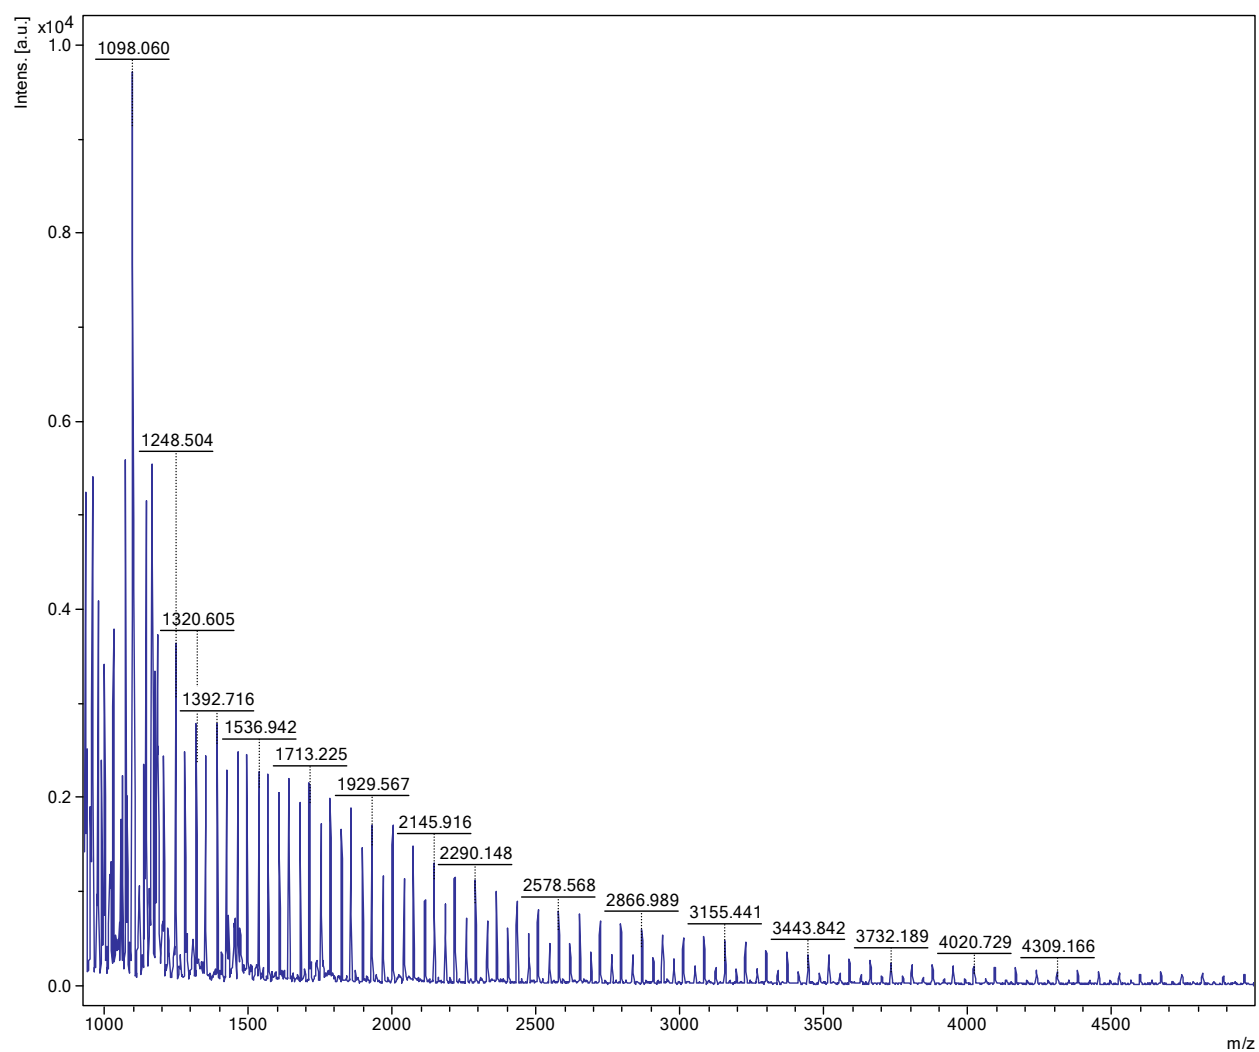

Figure S3.  $^1\text{H}$  NMR spectrum ( $\text{CDCl}_3$ , 400 MHz) of the PCL from run 5, Table 2.

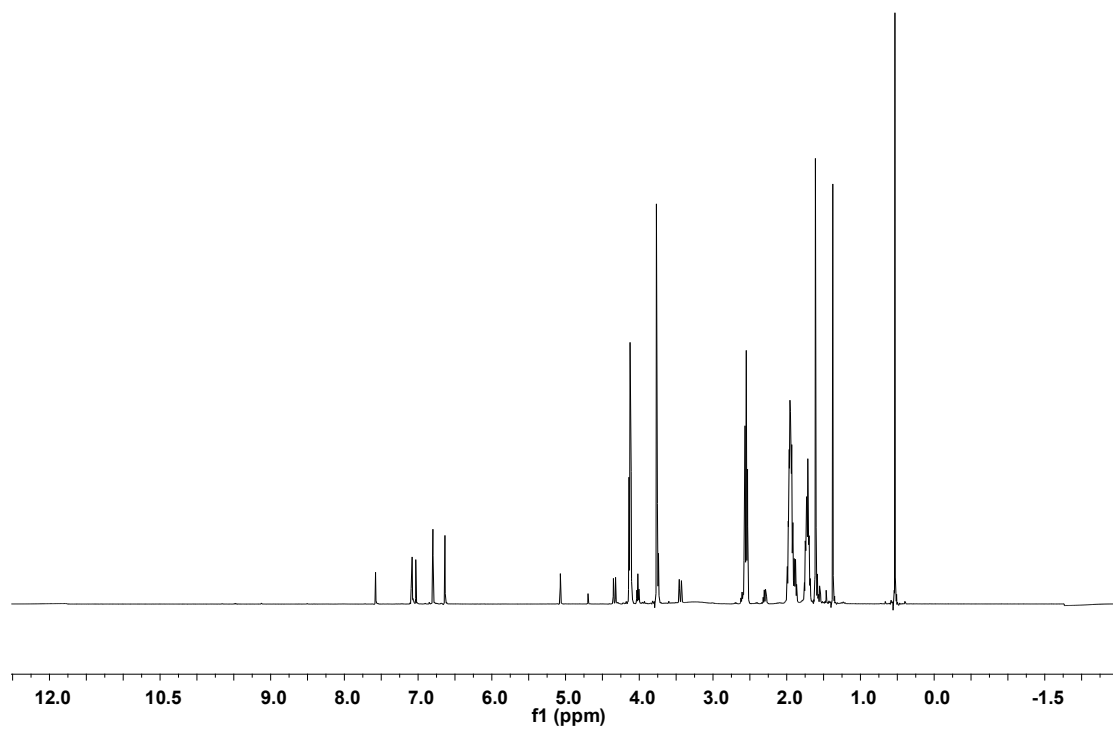

Supplement: c4dt02226b1.pdf [file c4dt02226b1.pdf]
